# Supplementary material for: Cation-regulated MnO2 reduction reaction enabling long-term stable zinc–manganese flow batteries with high energy density
Source: Royal Society of Chemistry journal article supplement (doi:10.1039/d4ee03385j), 2025-01-01
Supplement: d4ee03385j1.pdf [file d4ee03385j1.pdf]

1 **Supplementary Information**

2

3 **Cation-regulated MnO<sub>2</sub> Reduction Reaction Enabling Long-term Stable Zinc-**  
4 **Manganese Flow Batteries with High Energy Density**

5

6 *Yiqiao Wang<sup>1</sup>, Hu Hong<sup>1</sup>, Zhiquan Wei<sup>1</sup>, Dedi Li<sup>1</sup>, Xinru Yang<sup>1</sup>, Jiaxiong Zhu<sup>1</sup>, Pei Li<sup>1</sup>, Shengnan*  
7 *Wang<sup>1</sup> and Chunyi Zhi\*<sup>1</sup>*

8

9 <sup>1</sup>Department of Materials Science and Engineering, City University of Hong Kong, 83 Tat Chee  
10 Avenue, Kowloon, Hong Kong 999077, China

11

12 \*Corresponding Author

13 E-mail: cy.zhi@cityu.edu.hk (C. Zhi)

14

## 1 Table of Contents:

|    |                                                                                                                                                                                                                                  |    |
|----|----------------------------------------------------------------------------------------------------------------------------------------------------------------------------------------------------------------------------------|----|
| 2  | Experimental section .....                                                                                                                                                                                                       | 3  |
| 3  | Materials .....                                                                                                                                                                                                                  | 3  |
| 4  | Preparation of proton exchange membrane .....                                                                                                                                                                                    | 3  |
| 5  | Materials characterization .....                                                                                                                                                                                                 | 3  |
| 6  | Electrochemical characterization.....                                                                                                                                                                                            | 3  |
| 7  | Zn-Mn flow battery assembly .....                                                                                                                                                                                                | 4  |
| 8  | Inductively Coupled Plasma Mass Spectrometry (ICP-MS) Measurements .....                                                                                                                                                         | 4  |
| 9  | Gas Chromatography Measurements .....                                                                                                                                                                                            | 5  |
| 10 | Molecular dynamics (MD) simulations.....                                                                                                                                                                                         | 5  |
| 11 | Figure S1 Full profile of FT-IR and Raman spectra of the Mn-H and Mn-Mg-H with different concentrations.                                                                                                                         | 6  |
| 12 | Figure S2 Schematic of H-bonds between water molecules. ....                                                                                                                                                                     | 7  |
| 13 | Figure S3 Schematic of water molecules with (a) DA, (b) DDA, (c) DAA and (d) DDAA type H-bonds.....                                                                                                                              | 8  |
| 14 | Figure S4 Radial distribution functions of Mn-H and Mn-Mg-H show the first and second radii of the solvation shell.....                                                                                                          | 9  |
| 15 | Figure S5 Digital image of the catholyte during charging. ....                                                                                                                                                                   | 10 |
| 16 | Figure S6 Digital image of the Zn-Mn flow battery configuration. ....                                                                                                                                                            | 11 |
| 17 | Figure S7 Cyclic voltammetry of MnO <sub>2</sub> conversion reaction in Mn-H and Mn-Mg-H system at (a) 0 °C, respectively. The corresponding Tafel plots in (b) 25 °C and (c) 0 °C obtained from the initial cycle of CV curves. | 12 |
| 18 | .....                                                                                                                                                                                                                            | 12 |
| 19 | .....                                                                                                                                                                                                                            | 12 |
| 20 | .....                                                                                                                                                                                                                            | 12 |
| 21 | Figure S8 EIS spectra and equivalent circuit of Mn-H and Mn-Mg-H-based Zn-Mn FBs.....                                                                                                                                            | 13 |
| 22 | Figure S9 SEM images of the charged cathode.....                                                                                                                                                                                 | 14 |
| 23 | Figure S10. SEM images of the discharged cathode. ....                                                                                                                                                                           | 15 |
| 24 | Figure S11. SEM images of the cathode after 20 cycles.....                                                                                                                                                                       | 16 |
| 25 | Figure S12. EDS mapping of the cathode in Mn-H electrolyte. ....                                                                                                                                                                 | 17 |
| 26 | Figure S13. EDS results obtained from the HAADF-STEM. ....                                                                                                                                                                       | 18 |
| 27 | Figure S14. XPS spectra of discharged and recharged cathodes in Mn-Mg-H electrolytes. ....                                                                                                                                       | 19 |
| 28 | Table S1. Smart Quant Results collected by the EDS of HAADF-STEM.....                                                                                                                                                            | 20 |
| 29 | Table S2. ICP-MS results of the Mg-doped MnO <sub>2</sub> charged products.....                                                                                                                                                  | 21 |
| 30 | Figure S15. Raman spectra of the Mn-Mg-H electrolytes. ....                                                                                                                                                                      | 22 |
| 31 | Figure S16. XPS spectra of discharged and recharged cathodes in Mn-H electrolytes. ....                                                                                                                                          | 23 |
| 32 | Figure S17. Characterization of the intercalation behavior occurring during cycling. ....                                                                                                                                        | 24 |
| 33 | Figure S18. X-ray diffraction (XRD) of the cycled anode of Mn-Mg-H based Zn-Mn FBs.....                                                                                                                                          | 25 |
| 34 | Figure S19. Characterization of the electrodes of the failed Zn-Mn FBs. ....                                                                                                                                                     | 26 |
| 35 | Table S3. Smart quantitative results obtained from the Energy-dispersive X-ray spectroscopy (EDS).....                                                                                                                           | 27 |
| 36 | Figure S20. Cycling performance of the Zn-Mn FBs at different temperatures. ....                                                                                                                                                 | 28 |
| 37 | Table S4. Comparison of cycling performance of Zn-Mn FBs according to previous reports. ....                                                                                                                                     | 29 |
| 38 | Reference.....                                                                                                                                                                                                                   | 30 |

1

## 2 Experimental section

### 3 Materials

4 All reagents in this work are purchased analytically pure and without further purification. Manganese  
5 chloride ( $\text{MnCl}_2$ ) (Alfa Aesar, 99%), Magnesium chloride hexahydrate ( $\text{MgCl}_2 \cdot \text{H}_2\text{O}$ ) (Sigma-Aldrich,  
6 99%), Zinc acetate ( $\text{Zn}(\text{Ac})_2$ ) (Aladdin, 99%), Acetic acid (HAc) (Aladdin, AR) and Hydrochloric acid  
7 (HCl) (RCI Labscan, AR) were used for preparing electrolytes. All electrolytes were prepared with  
8 deionized (DI) water. Potassium hydroxide (KOH) (Aladdin, 99 %), Sulfuric acid ( $\text{H}_2\text{SO}_4$ ) (RCI  
9 Labscan, AR), Nafion membrane (N117, Dupont) was purchased from SCI Materials Hub. Hydrogen  
10 peroxide ( $\text{H}_2\text{O}_2$ ) (Sigma-Aldrich, 30 wt% in  $\text{H}_2\text{O}$ ) was purchased for the pre-treatment of the Nafion  
11 membrane. Carbon felt (CF) purchased from Liaoyang J-Carbon Materials Co., Ltd. (China) was used  
12 as received.

### 13 Preparation of proton exchange membrane

14 The received Nafion N117 membranes were pre-treated with the following steps before use. First, the  
15 membrane was soaked in 5 wt%  $\text{H}_2\text{O}_2$  solution at 80 °C for 1 hour, followed by flushing with DI water  
16 to remove excess  $\text{H}_2\text{O}_2$ . Then, the Nafion membrane was soaked in 0.5 M  $\text{H}_2\text{SO}_4$  at 80 °C for 1 hour  
17 and rinsed with DI water until the pH reached 7. Finally, the membrane was rinsed with DI water and  
18 stored in DI water.

### 19 Materials characterization

20 Fourier transform infrared spectrometer (FT-IR, PerkinElmer) and Raman spectrometer (WITec  
21 RAMAN alpha 300R) were used to analyze electrolyte composition and molecular interaction. X-Ray  
22 Diffraction (XRD, Rigaku X-ray Diffractometer SmartLab 9 kW), Scanning Electron Microscopy  
23 (SEM, Quattro S, Thermo Fisher Scientific) equipped with an energy-dispersive X-ray spectroscopy  
24 (EDS), Transmission electron microscopy (FEI Tecnai G2F 20), Raman spectroscopy and X-ray  
25 photoelectron spectroscopy (XPS, Thermal Fisher Scientific Escalab-Xi+) were employed to identify  
26 the product species and structure of cathode being discharged and charged.

### 27 Electrochemical characterization

28 LSV and CV measurements were carried out on the single-channel electrochemical workstation (CHI-  
29 760E) in a conventional single compartment three-electrode cell configuration at room temperature

1 (25 °C). Ag/AgCl electrode in saturated KCl was employed as a reference electrode (RE), a graphite  
2 rod and a platinum plate was served as the working (WE) and counter electrode (CE), respectively.  
3 The potential of WE was referenced to a standard hydrogen electrode (SHE) using this equation.

$$4 \quad E_{SHE} = E_{Ag/AgCl} - 0.22 \text{ V}$$

5 The LSV experiment was coupled with a gas chromatograph (GC), in which the Argon gas was  
6 employed as carrier gas.

7 The Tafel plot is obtained by plotting the overpotential against the logarithmic current density as the  
8 following equation.

$$9 \quad \eta = b * \log(j) + a$$

10 Where  $\eta$  is the overpotential  $E - E_0$ ,  $b$  refers to the tafel slope.

11 The EIS spectra were collected in the ultra low temperature chamber (ESPEC MC-812) by CHI-760E,  
12 the frequency range varied from  $10^6$  Hz to  $10^{-1}$  Hz for the two-electrode potentiostatic Zn-Mn  
13 batteries. The corresponding reaction resistance  $R_{ct}$  at different temperatures was obtained by fitting  
14 the equivalent circuit model of EIS. The apparent activation energy ( $E_a$ ) of the reaction at 1.6 V can  
15 be given according to the Arrhenius equation.

$$16 \quad k = A * \exp(-E_a/RT)$$

### 17 Zn-Mn flow battery assembly

18 The zinc-manganese flow battery (AZIFB) was assembled by sandwiching a membrane between two  
19 CF electrodes clamped by two graphite plates. The stainless-steel end plates were used to secure the  
20 battery. The active area of the electrode is  $2 \times 2 \text{ cm}^2$  with a thickness of 3 mm. The pre-treated Nafion  
21 membrane was used to separate the catholyte and anolyte. The anolyte contained 3 M  $\text{ZnCl}_2$ , 1 M  
22  $\text{Zn}(\text{Ac})_2$  and 1M HAc . The 1 M  $\text{MnCl}_2$  and 0.2 M HCl with/without 4 M  $\text{MgCl}_2$  were used as the Mn-  
23 H/Mn-Mg-H catholyte, respectively. Both the capacity of the cathode and anode were contributed by  
24 the active ions in the electrolytes, with the CFs acting as current collectors and no additional zinc or  
25 manganese sources to supplement them. A peristaltic pump from Chuang Rui Co. Ltd. was served to  
26 power the electrolyte flow through the electrodes. All the battery performance tests were conducted by  
27 LAND CT3001A multi-channel battery system.

28

## 1 Inductively Coupled Plasma Mass Spectrometry (ICP-MS) Measurements

2 The quantitative elemental analysis of the discharge products was performed by the ICP-MS (Agilent  
3 720ES). The discharged batteries were disassembled and the carbon felt from the cathode side was  
4 washed to remove residual electrolytes. After being cleaned and dried overnight, the carbon felt was  
5 ground and digested with concentrated hydrochloric acid. The suspension was filtered to remove  
6 residual carbon fibers to obtain the sample dispersion containing  $\text{Mg}^{2+}$  and  $\text{Mn}^{2+}$ .

7

## 8 Gas Chromatography Measurements

9 The oxygen evolution amounts were measured by an online gas chromatograph (Ruimin GC 2060)  
10 with a packed HayeSep D column and a thermal conductivity detector (TCD) for  $\text{O}_2$  quantification.  
11 Calibration gas mixtures (Linde) were employed for gas quantification. The continuous flow of Argon  
12 gas through the electrochemical cell carried volatile reaction products from the cell into the sampling  
13 loops of the GC.

14

## 15 Molecular dynamics (MD) simulations

16 MD simulations were performed using the Forcite module with the COMPASSIII forcefield<sup>1</sup>. For  
17 electrolyte structure determination, the simulation boxes containing 40  $\text{MnCl}_2$  and 8 HCl or 160  
18  $\text{MgCl}_2$ , 40  $\text{MnCl}_2$  and 8 HCl with 2000  $\text{H}_2\text{O}$  molecules corresponding to Mn-H and Mn-Mg-H,  
19 respectively, were established by amorphous cell module. Subsequently, all mixture systems were  
20 equilibrated by constant-pressure and constant-temperature (NPT) MD simulations for 1 ns at 303 K,  
21 after which canonical ensemble (NVT) MD simulations were used for 1 ns. The Ewald method<sup>2</sup> and  
22 atom-based cutoff method (i.e., a radius of 12.5 Å) were applied to conduct electrostatic and van der  
23 Waals (vdW) interactions, respectively.

24

25

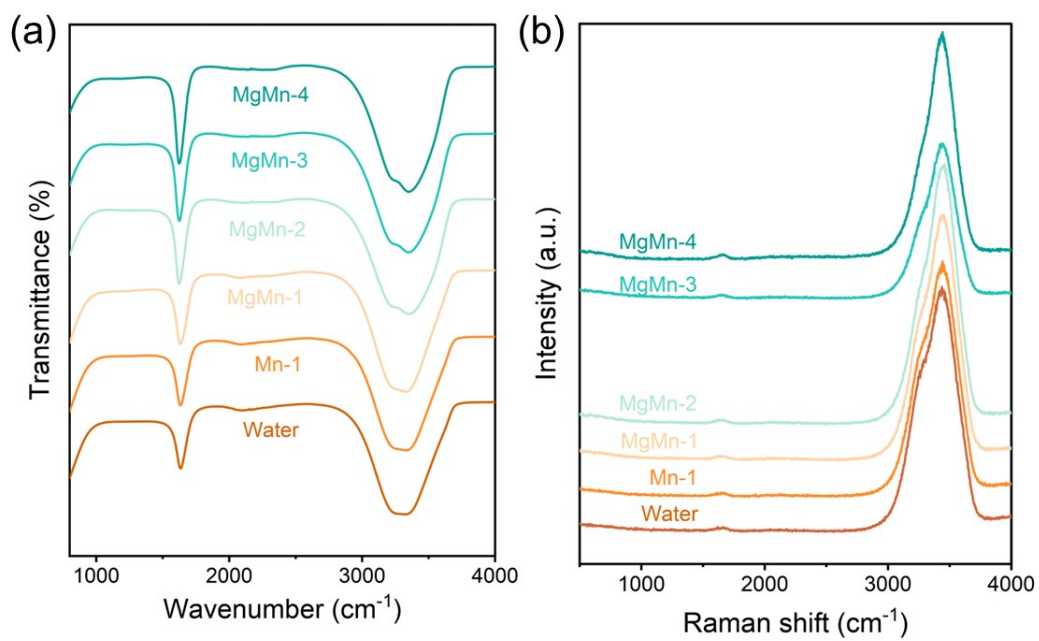

1

2 Figure S1 Full profile of FT-IR and Raman spectra of the Mn-H and Mn-Mg-H with different  
3 concentrations.

4

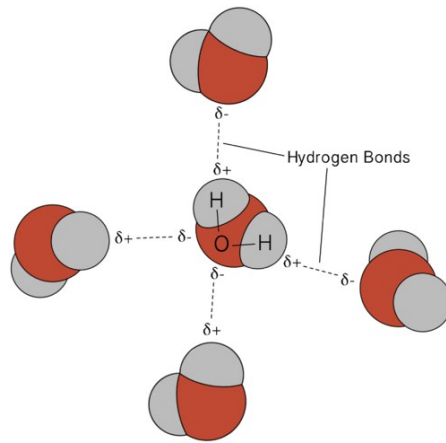

1

2 Figure S2 Schematic of H-bonds between water molecules.

3

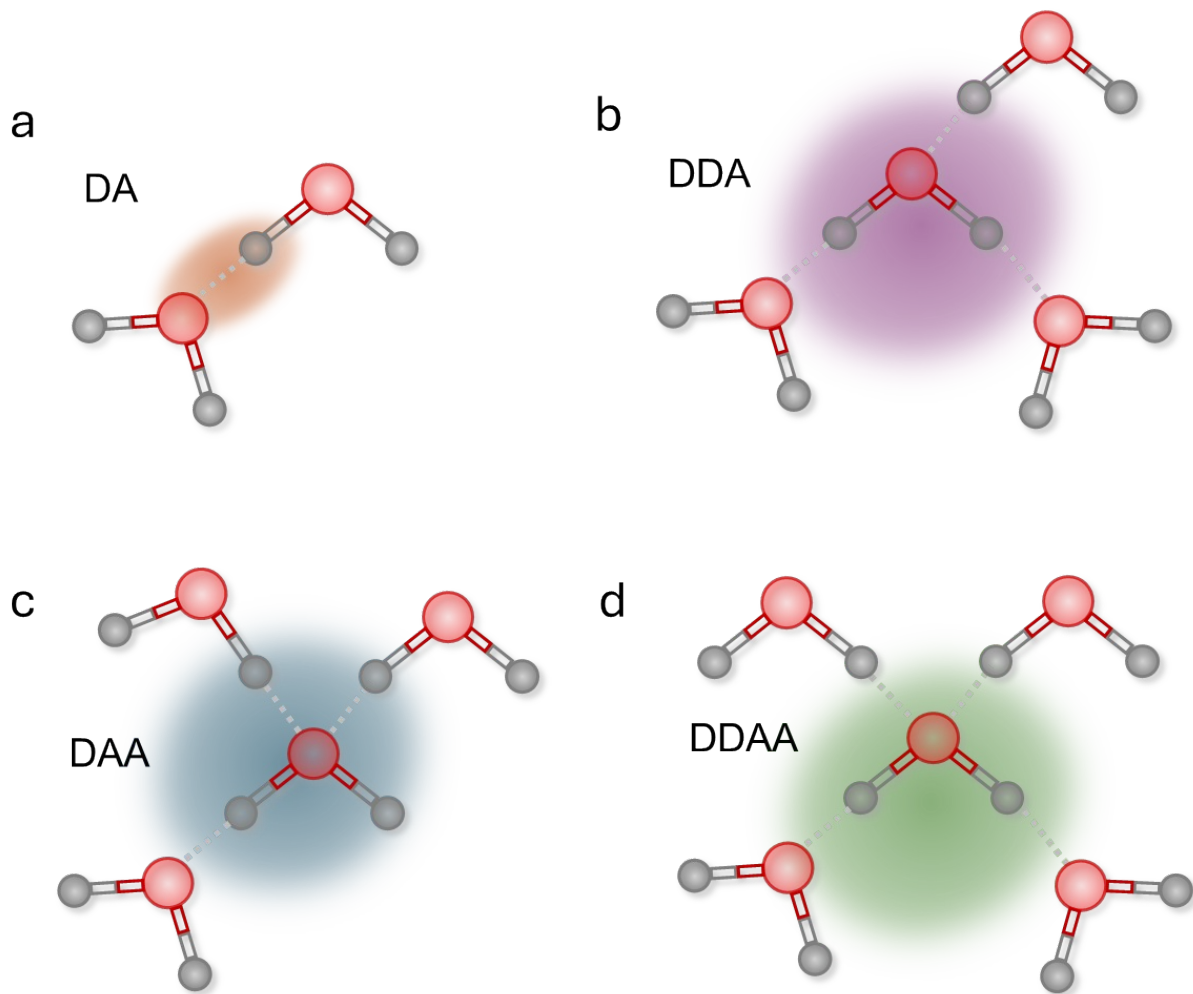

1

2 Figure S3 Schematic of water molecules with (a) DA, (b) DDA, (c) DAA and (d) DDAA type H-bonds.

3



1

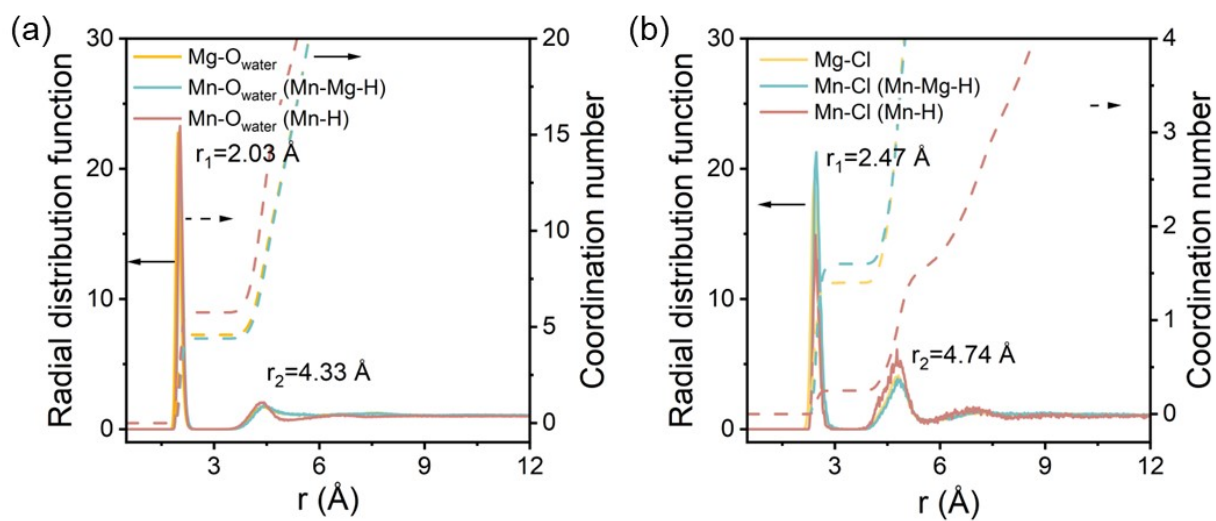

2

3 Figure S4 Radial distribution functions of Mn-H and Mn-Mg-H show the first and second radii of the  
4 solvation shell.

5

1

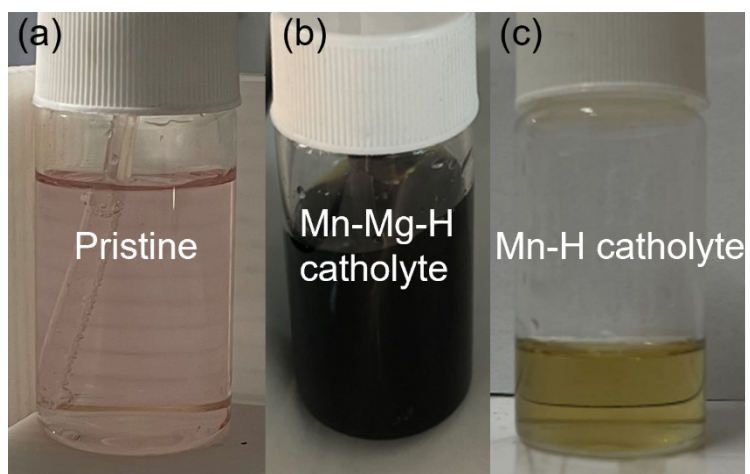

2

3 Figure S5 Digital image of the catholyte during charging.

4 (a) Mn-Mg-H based catholyte (a) before and (b) after positive scanning. (c) Mn-H based catholyte  
5 after charging.

6

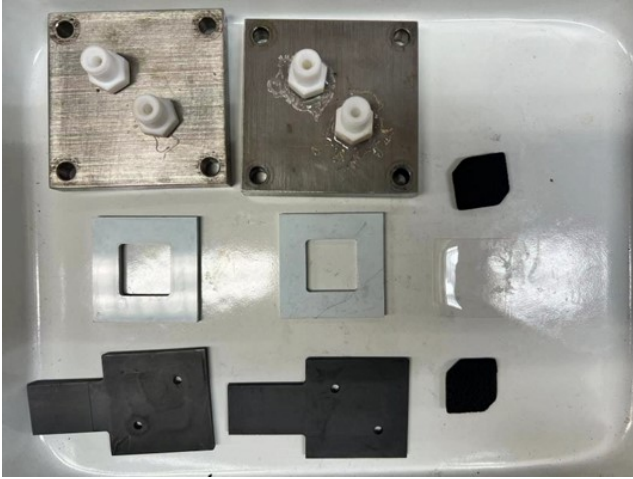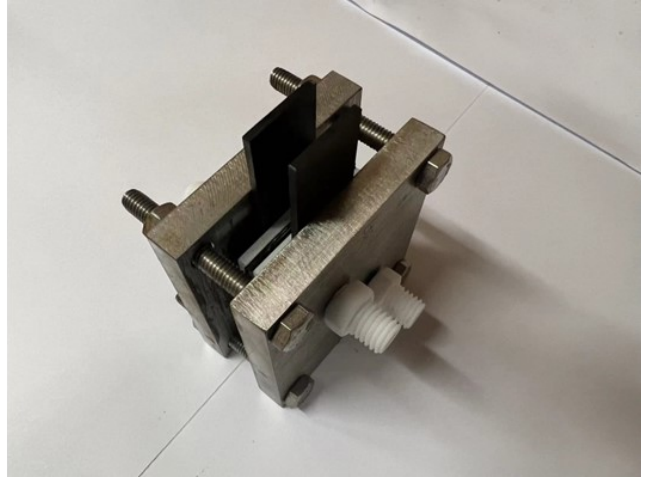

1

2 Figure S6 Digital image of the Zn-Mn flow battery configuration.

3

4

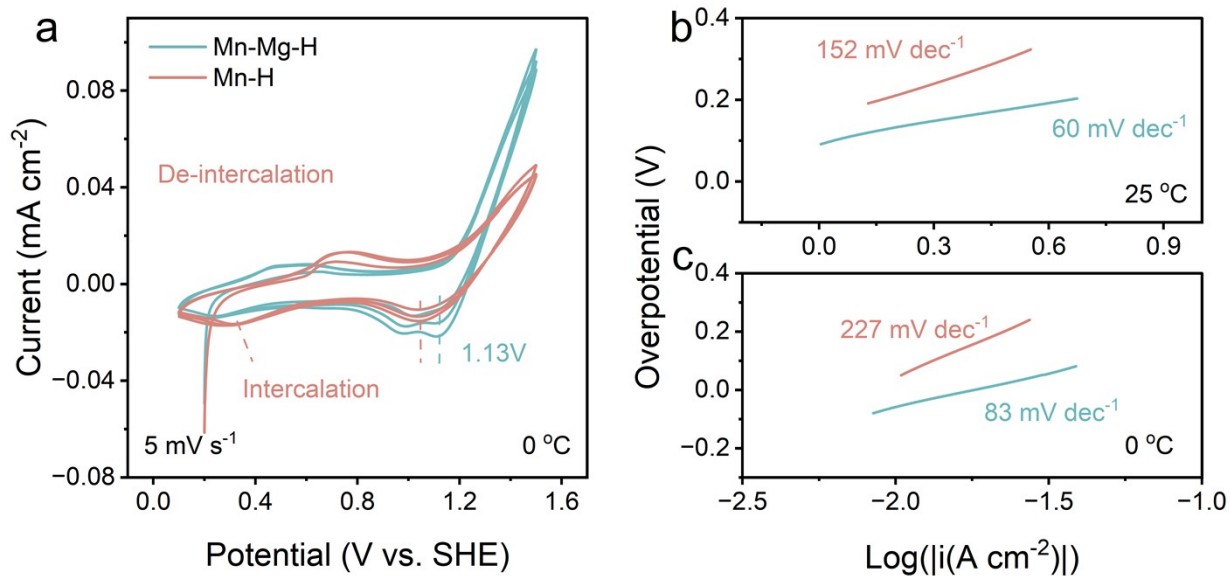

1

2 Figure S7 Cyclic voltammetry of MnO<sub>2</sub> conversion reaction in Mn-H and Mn-Mg-H system at (a) 0  
 3 °C, respectively. The corresponding Tafel plots in (b) 25 °C and (c) 0 °C obtained from the initial cycle  
 4 of CV curves.

5

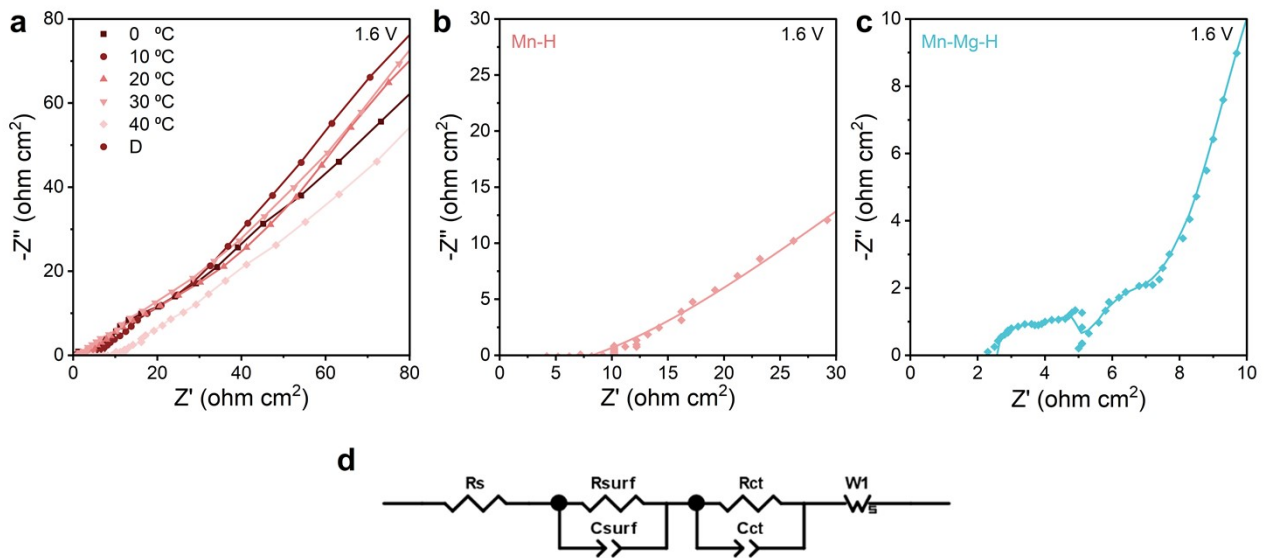

1

2 Figure S8 EIS spectra and equivalent circuit of Mn-H and Mn-Mg-H-based Zn-Mn FBs

3 (a) Nyquist plots of Mn-H-based Zn-Mn FBs at 0-40 °C. Nyquist plot of (b) Mn-H and (c) Mn-Mg-H based batteries

4 at high frequencies of EIS at 40 °C. (d) Schematic of the equivalent circuit. The inset equivalent circuit is used to

5 simulate the resistances, where  $R_s$  is the ohmic resistance,  $R_{surf}$  and  $C_{surf}$  are the charge-transfer resistance and double-

6 layer capacitance at anode/electrolyte interphase,  $R_{ct}$  and  $C_{ct}$  are the charge-transfer resistance and double-layer

7 capacitance at cathode/electrolyte interphase, and  $W_1$  is the Warburg impedance.

8

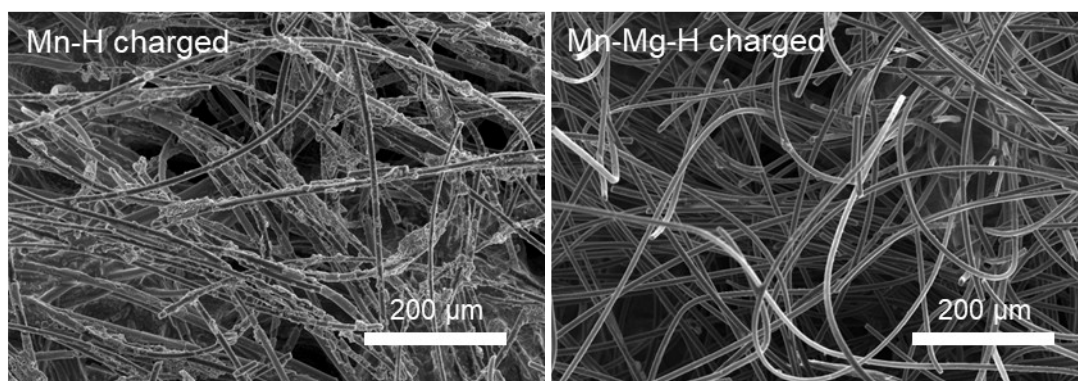

1

2 Figure S9 SEM images of the charged cathode.

3 (a) SEM image of the Mn-H cathode. (b) SEM image of the Mn-Mg-H cathode.

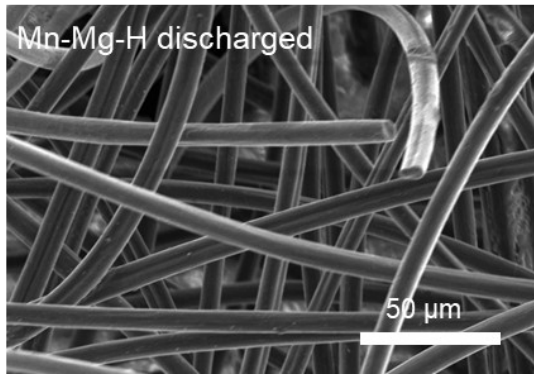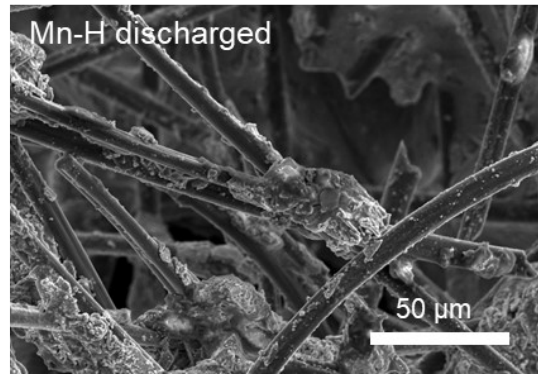

1

2 Figure S10. SEM images of the discharged cathode.

3 (a) SEM image of the Mn-Mg-H cathode. (b) SEM image of the Mn-H cathode.

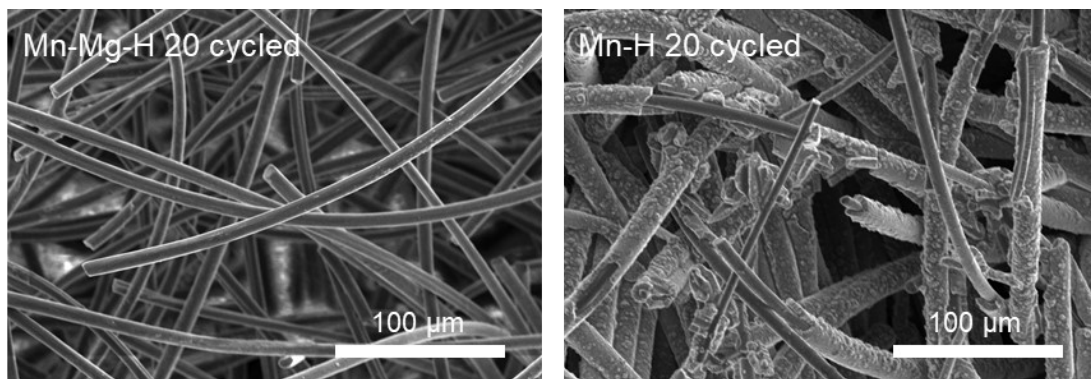

1

2 Figure S11. SEM images of the cathode after 20 cycles.

3 (a) SEM image of the Mn-Mg-H cathode. (b) SEM image of the Mn-H cathode.

4



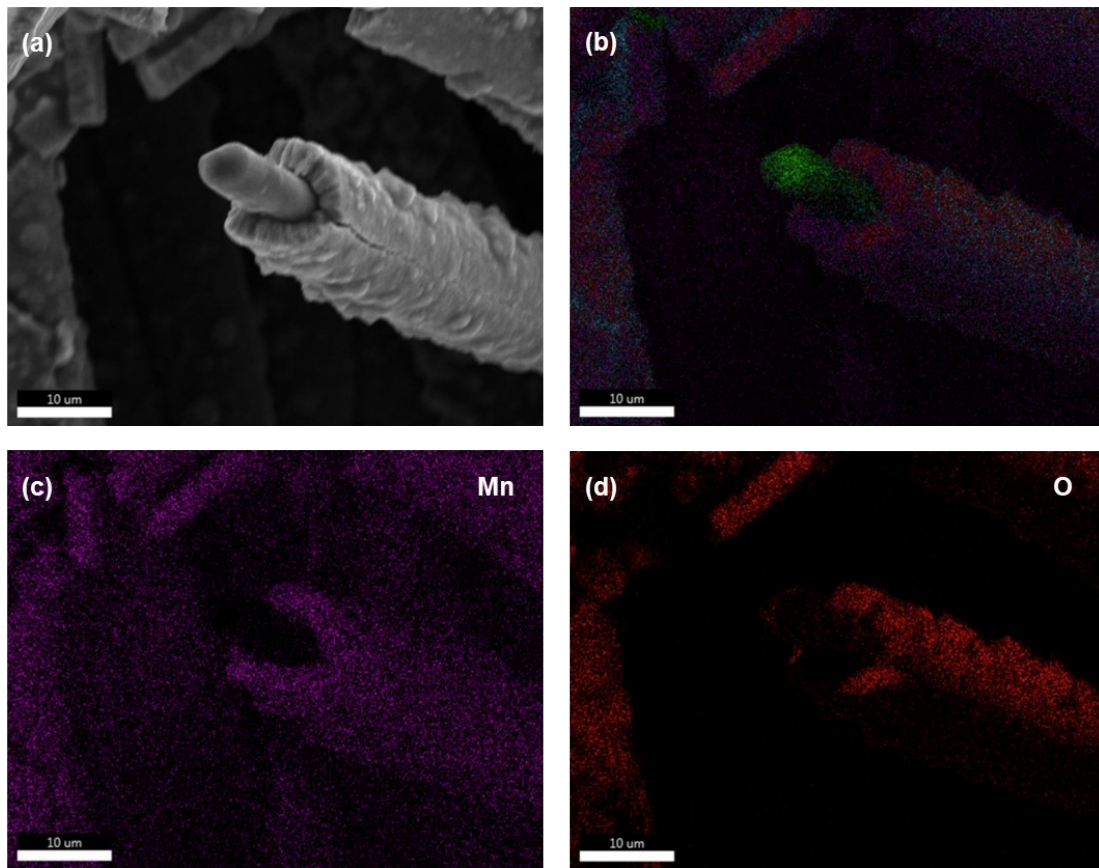

1

2 Figure S12. EDS mapping of the cathode in Mn-H electrolyte.

3 (a) SEM image of the charged Mn-H cathode. (b) Overlapped image, (c) Mn and (d) O element of EDS mapping.

4

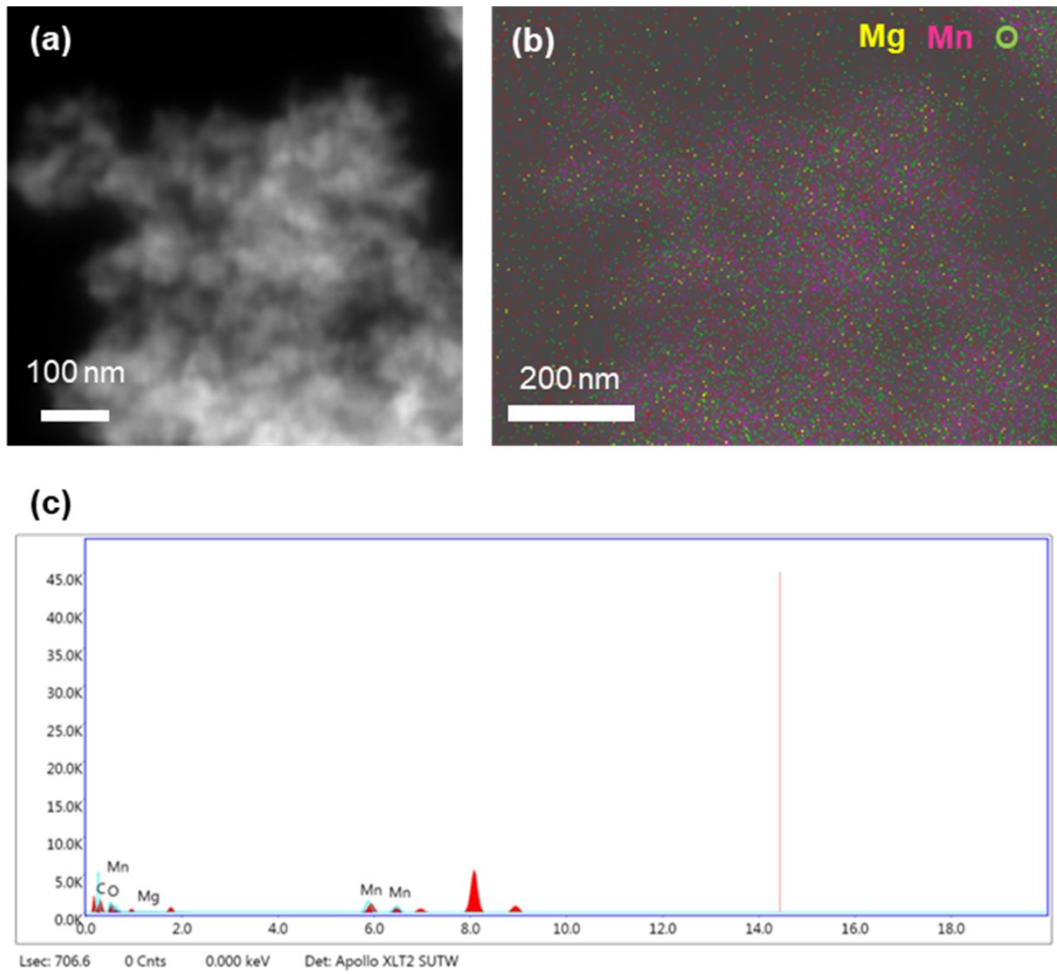

1

2 Figure S13. EDS results obtained from the HAADF-STEM.

3 (a) HAADF-STEM image of the Mg-doped  $\text{MnO}_2$  particles. (b) overlapped EDS mapping of Mg, Mn and O elements.

4 (c) EDS spectrum.

5

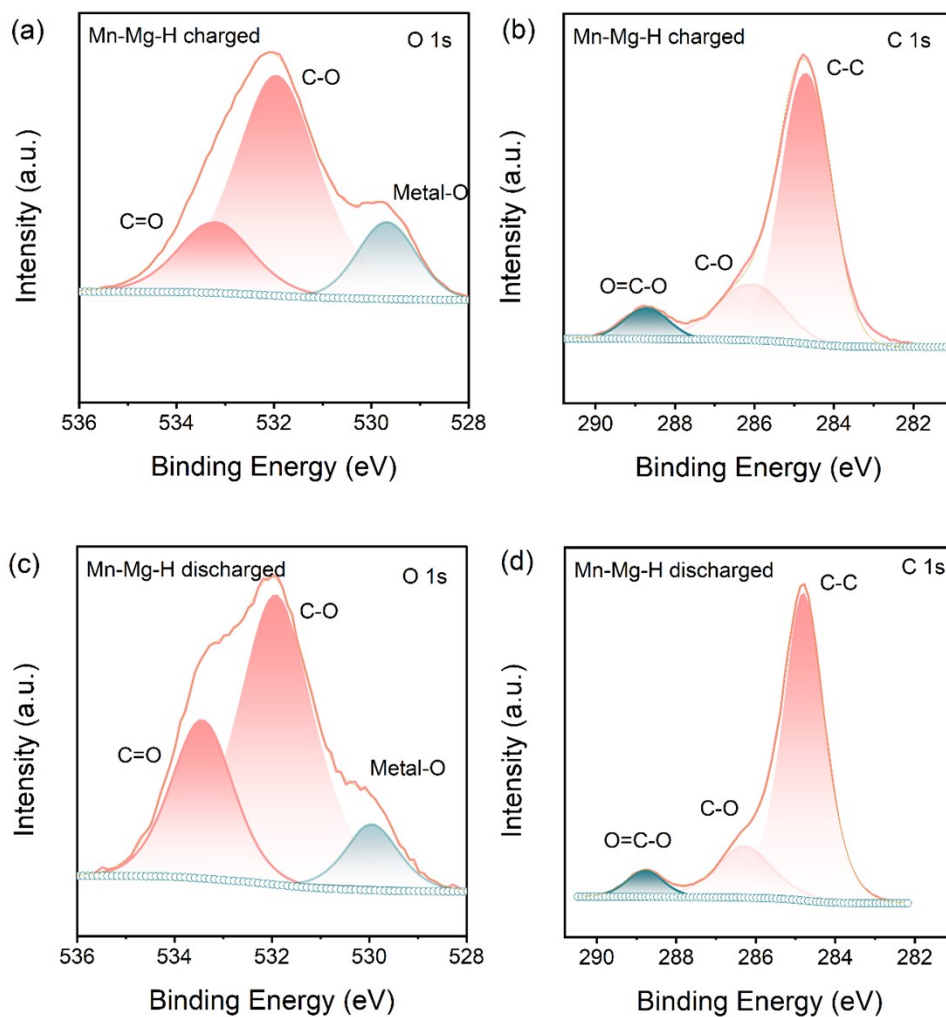

1

2 **Figure S14. XPS spectra of discharged and recharged cathodes in Mn-Mg-H electrolytes.**

3 (a) O 1s and (b) C 1s XPS spectra of the charged cathode. (c) O 1s and (d) C 1s XPS spectra of discharged cathode

4 The decreased intensity of Metal-O and increased intensity of C-O related species after discharge prove the reversible

5 decomposition of Mg-doped  $\text{MnO}_2$ .

1 Table S1. Smart Quant Results collected by the EDS of HAADF-STEM.

2

| Element | Weight % | Atomic % | Net Error% |
|---------|----------|----------|------------|
| C K     | 46.83    | 72.13    | 0.67       |
| O K     | 12.08    | 13.97    | 1.93       |
| MgK     | 0.14     | 0.11     | 13.97      |
| MnK     | 40.95    | 13.79    | 0.72       |
| C K     | 46.83    | 72.13    | 0.67       |

3

4

1 Table S2. ICP-MS results of the Mg-doped MnO<sub>2</sub> charged products

| Sample | Sample volume (mL) | Calibration volume/V <sub>0</sub> (mL) | Measurement concentration/C <sub>0</sub> (mg/L) | Dilution factor/f | Dilutor/Sample concentration/C <sub>1</sub> (mg/L) | Sample concentration/C <sub>x</sub> (mg/L) | Stoichiometric ratio |
|--------|--------------------|----------------------------------------|-------------------------------------------------|-------------------|----------------------------------------------------|--------------------------------------------|----------------------|
| Mg     | 1                  | 1                                      | 0.3181                                          | 1                 | 0.3181                                             | 3.18                                       | 0.015                |
| Mg     | 1                  | 1                                      | 0.3181                                          | 1                 | 0.3181                                             | 3.23                                       | 0.015                |
| Mg     | 1                  | 1                                      | 0.3181                                          | 1                 | 0.3181                                             | 3.21                                       | 0.015                |
| Mn     | 1                  | 10                                     | 4.5718                                          | 10                | 45.7178                                            | 457.18                                     | 0.985                |
| Mn     | 1                  | 10                                     | 4.6956                                          | 10                | 46.9559                                            | 469.56                                     | 0.985                |
| Mn     | 1                  | 10                                     | 4.6462                                          | 10                | 46.4617                                            | 464.62                                     | 0.985                |

2  
3 Due to the large concentration difference between the Mn and Mg elements, the samples for Mn were  
4 diluted by a factor of 10 during the volumetric calibration (*V*<sub>0</sub>) and measuring sessions (*dilute factor*  
5 *f*), respectively. In contrast, the Mg samples were maintained at primitive concentration. The relative  
6 stoichiometric ratios of the elements Mg and Mn were obtained from three separate tests on two sets  
7 of samples, and the conversion equations are shown in (1)-(4).

$$C_x(\text{mg/L}) = \frac{C_x(\text{mg/L}) * f * V_0(\text{mL}) * 10^{-3}}{m(\text{g}) * 10^{-3}} = \frac{C_1(\text{mg/L}) * V_0(\text{mL}) * 10^{-3}}{m(\text{g}) * 10^{-3}} \quad (1)$$

$$C_1(\text{mg/L}) = C_0(\text{mg/L}) * f \quad (2)$$

$$x(\text{Mg}) = \frac{\frac{C_x(\text{mg/L})}{M(\text{Mg})}}{\frac{C_x(\text{mg/L})}{M(\text{Mg})} + \frac{C_x(\text{mg/L})}{M(\text{Mn})}} \quad (3)$$

$$x(\text{Mn}) = 1 - x(\text{Mg}) \quad (4)$$

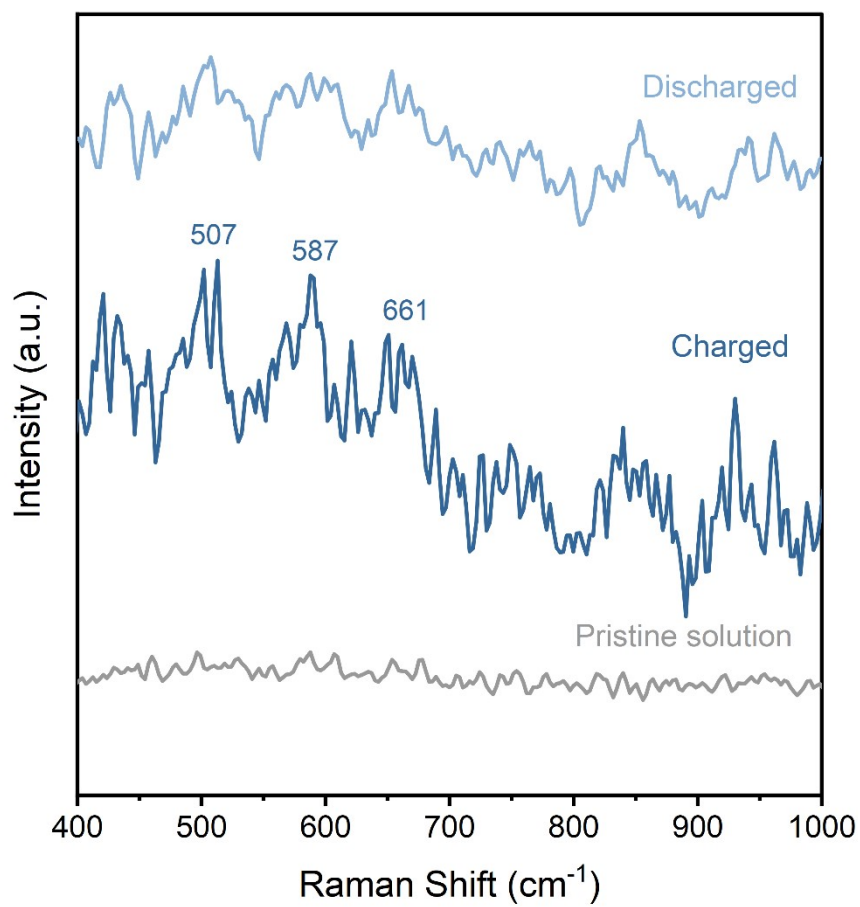

1

2 Figure S15. Raman spectra of the Mn-Mg-H electrolytes.

3 The appearance and weakening of the characteristic peaks demonstrate the reversible formation and decomposition

4 of Mg-doped MnO<sub>2</sub> products in the electrolytes.

5

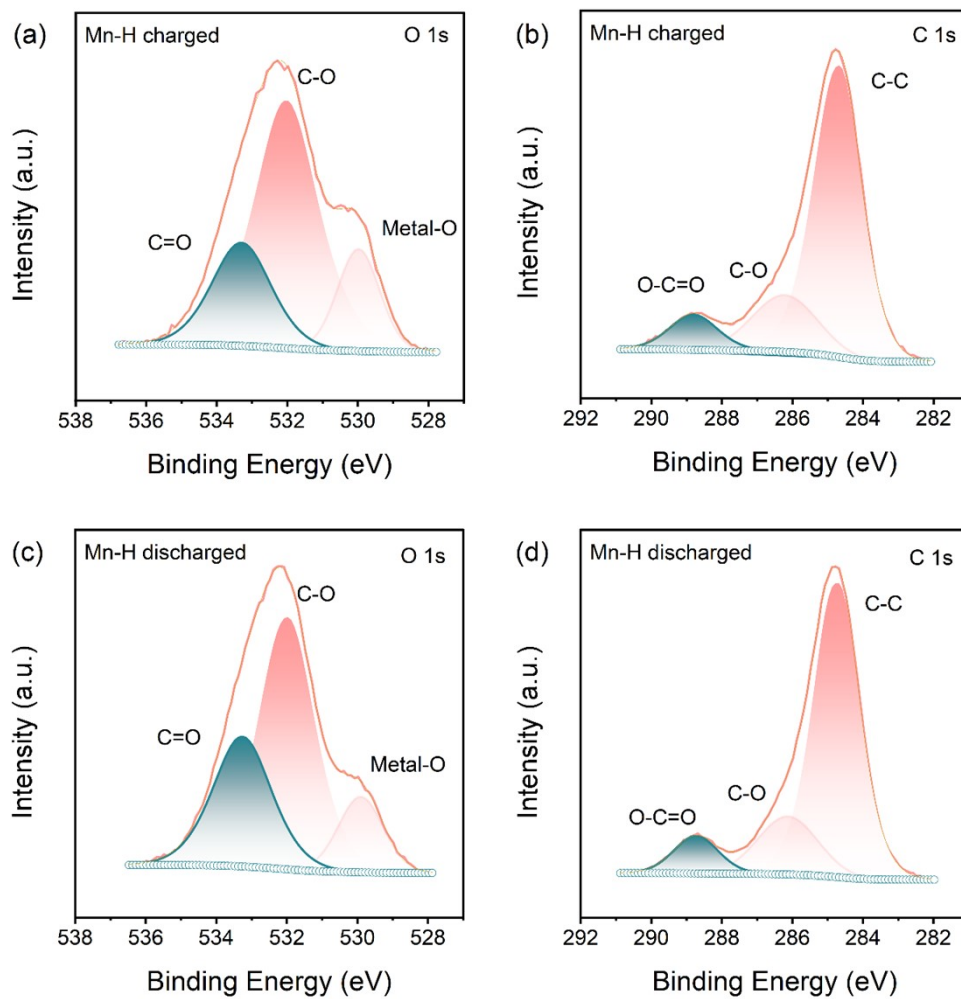

1

2 Figure S16. XPS spectra of discharged and recharged cathodes in Mn-H electrolytes.

3 (a) O 1s and (b) C 1s XPS spectra of the charged cathode. (c) O 1s and (d) C 1s XPS spectra of discharged cathode.

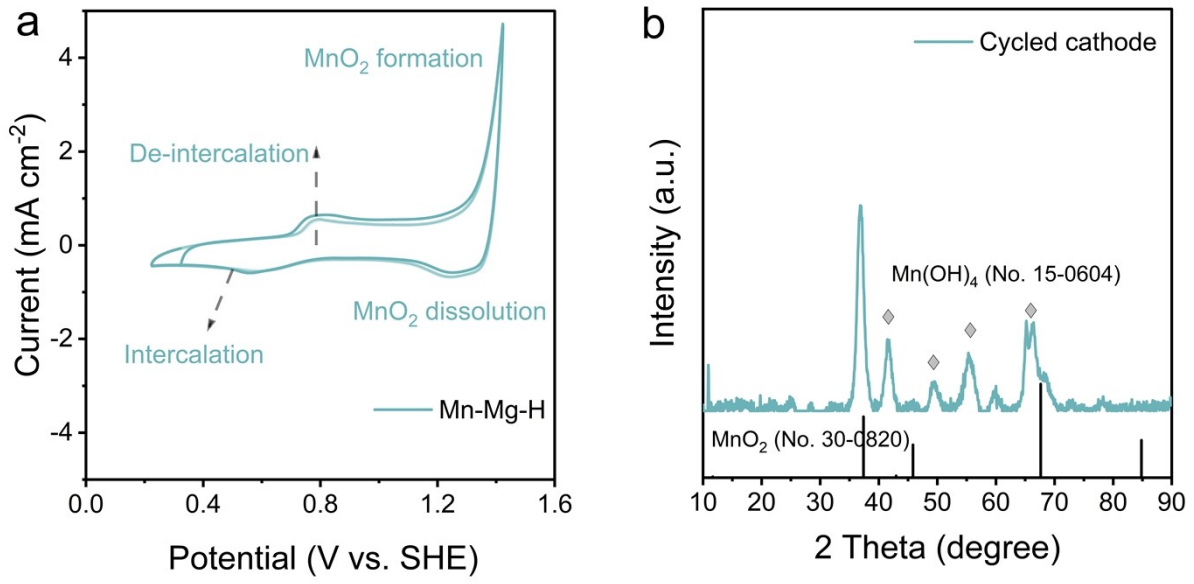

1

2 Figure S17. Characterization of the intercalation behavior occurring during cycling.

3 (a) Initial cycles of Cyclic voltammetry (CV) of cathode reaction in Mn-Mg-H electrolytes. (b) X-ray diffraction

4 (XRD) of the cycled cathode of Mn-Mg-H based Zn-Mn FBs.



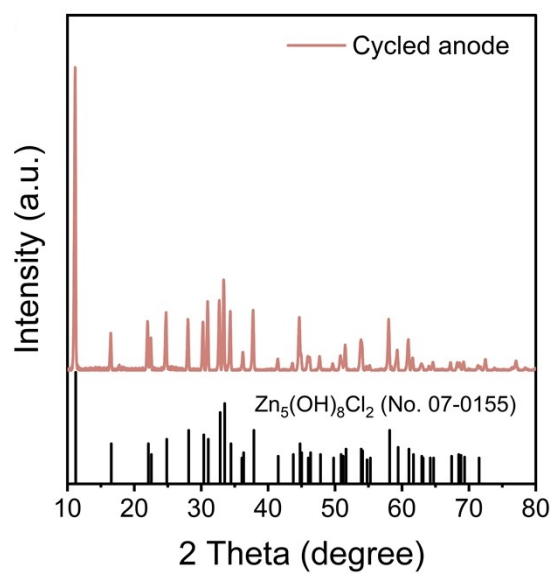

1

2 Figure S18. X-ray diffraction (XRD) of the cycled anode of Mn-Mg-H based Zn-Mn FBs

3

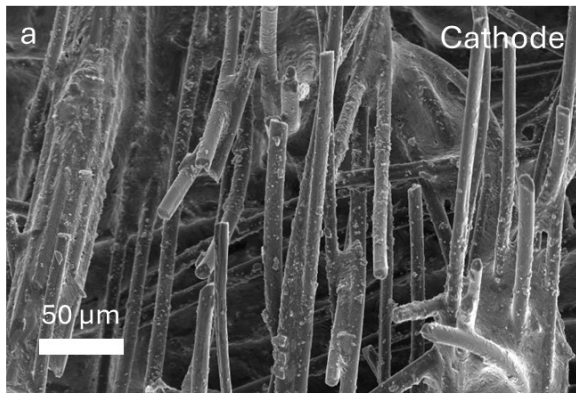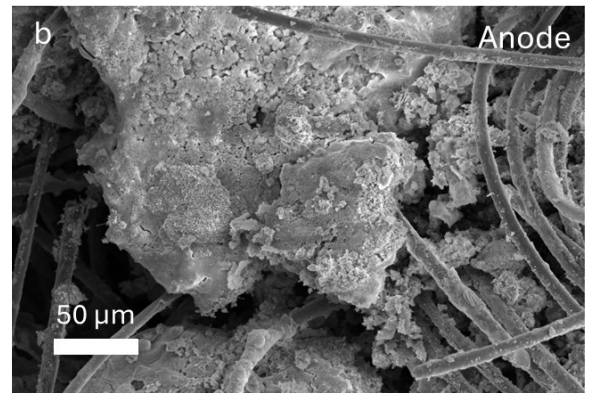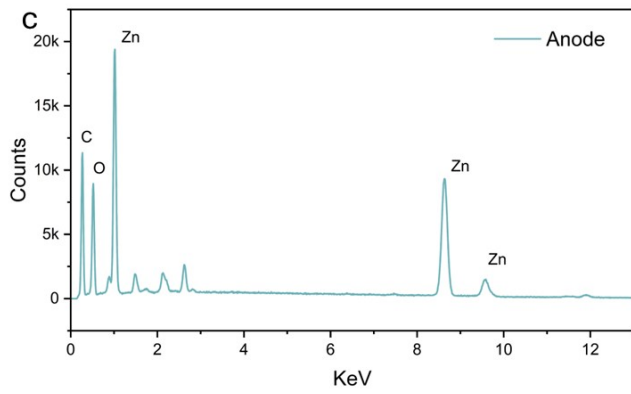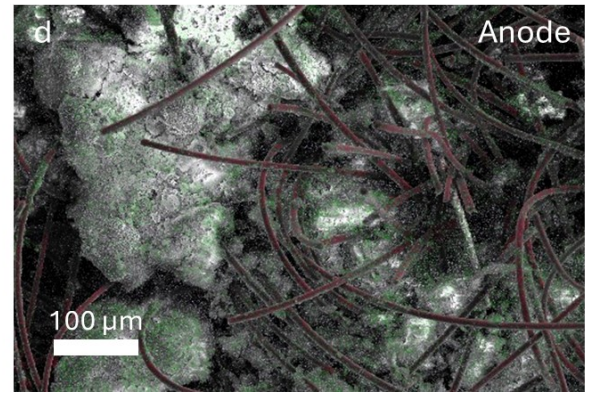

1

2 **Figure S19. Characterization of the electrodes of the failed Zn-Mn FBs.**

3 SEM image of the cycled (a) cathode and (b) anode of the Mn-Mg-H based Zn-Mn FBs. (c) Energy-dispersive X-

4 ray spectroscopy (EDS) of the cycled anode. (d) Overlaid EDS mapping of the cycled anode.

5

1 Table S3. Smart quantitative results obtained from the Energy-dispersive X-ray spectroscopy (EDS)

| Element | Weight (%) | Atomic (%) | Net Int. | K-ratio |
|---------|------------|------------|----------|---------|
| C       | 41.8       | 65.6       | 305.5    | 0.1011  |
| O       | 19.1       | 22.5       | 264.3    | 0.0320  |
| Zn      | 35.1       | 10.1       | 728.8    | 0.2872  |
| Cl      | 1          | 0.6        | 99.4     | 0.0076  |
| Au      | 1.1        | 0.8        | 68.1     | 0.0039  |

1

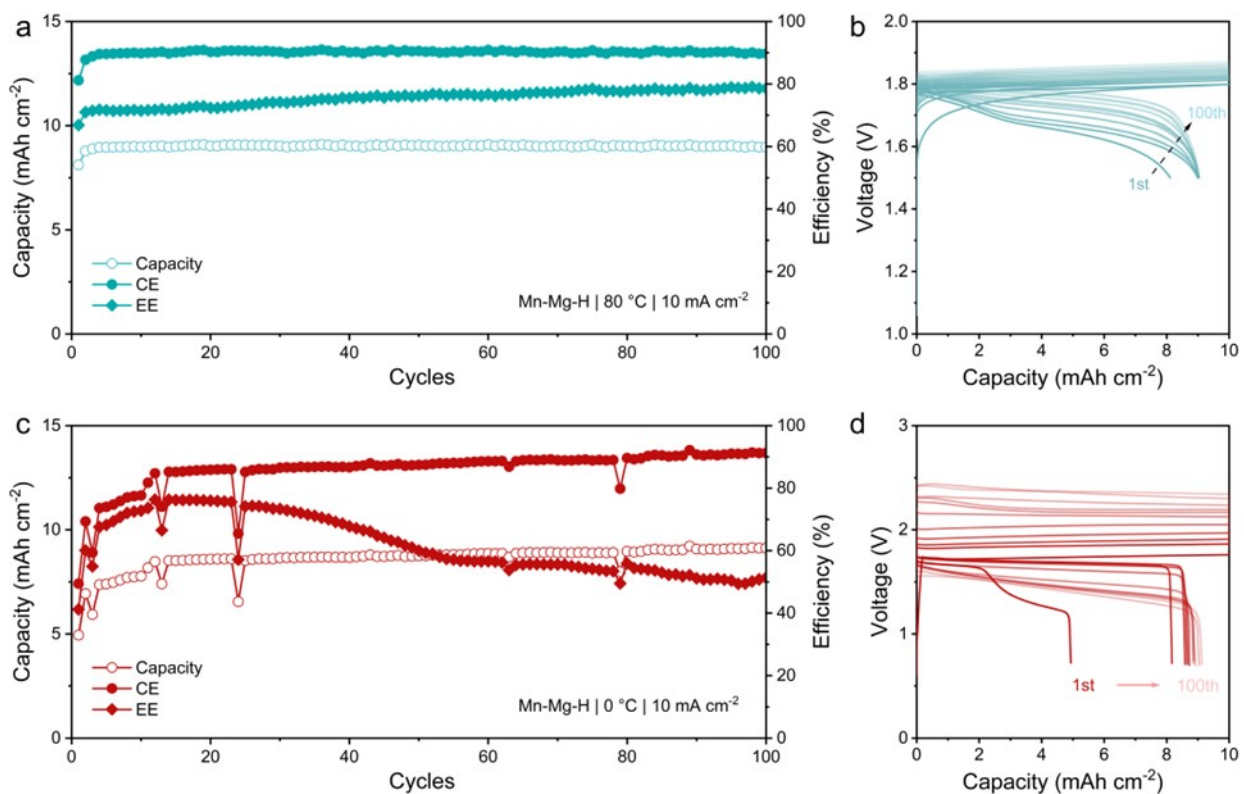

2

3 Figure S20. Cycling performance of the Zn-Mn FBs at different temperatures.

4 Cycling performance of the Zn-Mn FBs at (a) 80 °C and (b) the corresponding galvanostatic charge and discharge

5 (GCD) profiles. (c) Cycling performance of Zn-Mn FBs at 0 °C and (d) the corresponding GCD profiles. All the

6 batteries were charged to 10 mAh cm<sup>-2</sup> at 10 mA cm<sup>-2</sup>.

7

1

2 Table S4. Comparison of cycling performance of Zn-Mn FBs according to previous reports.

3

| Article          | Catholyte                                                                                                                               | Anolyte                                                   | Voltage<br>(V) | Areal<br>capacity<br>(mAh cm <sup>-2</sup> ) | Energy<br>density<br>(mWh cm <sup>-2</sup> ) | Cycles |
|------------------|-----------------------------------------------------------------------------------------------------------------------------------------|-----------------------------------------------------------|----------------|----------------------------------------------|----------------------------------------------|--------|
| 1 <sup>3</sup>   | 1M Mn(Ac) <sub>2</sub> + 1M Zn(Ac) <sub>2</sub> + 2M KCl                                                                                |                                                           | 1.5            | 7                                            | 10.5                                         | 400    |
| 2 <sup>4</sup>   | 1M Mn(Ac) <sub>2</sub> + 1M Zn(Ac) <sub>2</sub> + 2M KCl +<br>0.1M KI                                                                   |                                                           | 1.45           | 15                                           | 21.75                                        | 225    |
| 3 <sup>5</sup>   | 1M MnSO <sub>4</sub> + 1M ZnSO <sub>4</sub>                                                                                             |                                                           | 1.62           | 4                                            | 6.5                                          | 500    |
| 4 <sup>6</sup>   | 1M MnSO <sub>4</sub> , 0.09M CoSO <sub>4</sub> , 0.06M<br>NiSO <sub>4</sub> and 0.1M H <sub>2</sub> SO <sub>4</sub>                     |                                                           | 1.9            | 9.5                                          | 18.05                                        | 600    |
| 5 <sup>7</sup>   | 1M Li <sub>2</sub> SO <sub>4</sub> + 1M ZnSO <sub>4</sub>                                                                               |                                                           | 1.8            | 1.02                                         | 1.84                                         | 1000   |
| 6 <sup>8</sup>   | 2.5M NaMnO <sub>4</sub> +<br>5M NaOH                                                                                                    | 0.2M<br>Na <sub>2</sub> Zn(OH) <sub>4</sub> +<br>5M NaOH. | 1.9            | 1.75                                         | 3.33                                         | 1200   |
| 7 <sup>9</sup>   | 0.5M EDTA-Mn +<br>3M NaCl                                                                                                               | 0.5M ZnCl <sub>2</sub> + 3M<br>NaCl                       | 1.35           | 1.67                                         | 2.25                                         | 400    |
| 8 <sup>10</sup>  | 0.4 vol% MnO <sub>2</sub> in<br>2 M ZnSO <sub>4</sub> + 0.1<br>M MnSO <sub>4</sub>                                                      | Zn pellets and Zn<br>foil                                 | 1.35           | 4.21                                         | 5.68                                         | 100    |
| 9 <sup>11</sup>  | 2M MnSO <sub>4</sub> + 1M<br>KCl                                                                                                        | 2M ZnSO <sub>4</sub> + 1M<br>KCl                          | 1.85           | 8.3                                          | 15.36                                        | 100    |
| 10 <sup>12</sup> | 0.025 M FeSO <sub>4</sub> + 1<br>M MnSO <sub>4</sub> + 0.5 M<br>H <sub>2</sub> SO <sub>4</sub> + 1 M<br>Na <sub>2</sub> SO <sub>4</sub> | 1M ZnSO <sub>4</sub> + 1M<br>NaAc + 1M HAc                | 1.91           | 10                                           | 19.1                                         | 200    |
| 11 <sup>13</sup> | 0.5M H <sub>2</sub> SO <sub>4</sub> + 1M<br>MnSO <sub>4</sub>                                                                           | 2.4M KOH, and<br>0.1M Zn(Ac) <sub>2</sub>                 | 2.3            | 0.4                                          | 0.92                                         | 1500   |
| 12 <sup>14</sup> | 0.1M MnSO <sub>4</sub> +<br>2.5M H <sub>2</sub> SO <sub>4</sub> with<br>BiO catalyst                                                    | 0.1M [Zn(OH) <sub>4</sub> ] <sup>2-</sup><br>+ 4M NaOH    | 2.5            | 7                                            | 17.5                                         | 150    |
| 13 <sup>15</sup> | 0.2M MnSO <sub>4</sub> and<br>1M H <sub>2</sub> SO <sub>4</sub>                                                                         | 0.2M ZnSO <sub>4</sub> and<br>2M NaOH                     | 2.2            | 1                                            | 2.2                                          | 100    |

## 1 Reference

- 2 1 H. Sun, *J. Phys. Chem. B*, 1998, **102**, 7338–7364.
- 3 2 M. P. Tosi, in *Solid State Physics*, eds. F. Seitz and D. Turnbull, Academic Press, 1964, vol. 16, pp.  
4 1–120.
- 5 3 C. Xie, T. Li, C. Deng, Y. Song, H. Zhang and X. Li, *Energy Environ. Sci.*, 2020, **13**, 135–143.
- 6 4 J. Lei, Y. Yao, Z. Wang and Y.-C. Lu, *Energy & Environmental Science*, 2021, **14**, 4418–4426.
- 7 5 G. Li, W. Chen, H. Zhang, Y. Gong, F. Shi, J. Wang, R. Zhang, G. Chen, Y. Jin, T. Wu, Z. Tang  
8 and Y. Cui, *Adv. Energy Mater.*, 2020, **10**, 1902085.
- 9 6 M. Chuai, J. Yang, M. Wang, Y. Yuan, Z. Liu, Y. Xu, Y. Yin, J. Sun, X. Zheng, N. Chen and W.  
10 Chen, *eScience*, 2021, **1**, 178–185.
- 11 7 N. Liu, M. K. J. Pan, Y. Hu, Y. Sun and X. Liu, *J. Electrochem. Soc.*, 2020, **167**, 040517.
- 12 8 W. Xiang, M. Yang, M. Ding, X. Chen, J. Liu, G. Zhou, C. Jia and G. I. N. Waterhouse, *Energy*  
13 *Storage Materials*, 2023, **61**, 102894.
- 14 9 X. Yu, Y. Song and A. Tang, *Journal of Power Sources*, 2021, **507**, 230295.
- 15 10 T. M. Narayanan, Y. G. Zhu, E. Gençer, G. McKinley and Y. Shao-Horn, *Joule*, 2021, **5**, 2934–  
16 2954.
- 17 11 R. pandiyan Naresh, K. Mariyappan, D. Dixon, M. Ulaganathan and P. Ragupathy, *Batteries &*  
18 *Supercaps*, 2021, **4**, 1464–1472.
- 19 12 Q. Wang, W. Zhou, Y. Zhang, H. Jin, X. Li, T. Zhang, B. Wang, R. Zhao, J. Zhang, W. Li, Y.  
20 Qiao, C. Jia, D. Zhao and D. Chao, *National Science Review*, 2024, **11**, nwae230.
- 21 13 C. Liu, X. Chi, Q. Han and Y. Liu, *Advanced Energy Materials*, 2020, **10**, 1903589.
- 22 14 M. Kim, S. Lee, J. Choi, J. Park, J.-W. Park and M. Park, *Energy Storage Materials*, 2023, **55**,  
23 698–707.
- 24 15 B. Kim, Y. S. Kim, D. Dulyawat and C.-H. Chung, *Journal of Energy Storage*, 2023, **72**, 108337.  
25
